# Supplementary material for: Determinants of clinical practice guidelines’ utilization for the management of musculoskeletal disorders: a scoping review
Source: PubMed Central journal article supplement (PMC8170973; doi:10.1186/s12891-021-04204-w), 2021-06-01
Supplement: 12891_2021_4204_MOESM1_ESM.pdf [file 12891_2021_4204_MOESM1_ESM.pdf]

## Appendix 1 Search strategy in Medline

Search run March 10, 2018 in Ovid MEDLINE: Epub Ahead of Print, In-Process & Other Non-Indexed Citations, Ovid MEDLINE® Daily and Ovid MEDLINE® 1946-Present: 2871 results. The search was updated on December 1<sup>st</sup>, 2019 and on March 12<sup>th</sup>, 2021.

| #  | Searches                                                                                                                            |
|----|-------------------------------------------------------------------------------------------------------------------------------------|
| 1  | Whiplash Injuries/                                                                                                                  |
| 2  | Headache/                                                                                                                           |
| 3  | Post-Traumatic Headache/                                                                                                            |
| 4  | Tension-Type Headache/                                                                                                              |
| 5  | Neck Injuries/                                                                                                                      |
| 6  | Neck Pain/                                                                                                                          |
| 7  | Neck Muscles/in [Injuries]                                                                                                          |
| 8  | exp Cervical Vertebrae/in [Injuries]                                                                                                |
| 9  | Radiculopathy/                                                                                                                      |
| 10 | exp Brachial Plexus Neuropathies/                                                                                                   |
| 11 | exp Torticollis/                                                                                                                    |
| 12 | whiplash.ab,kw,ti.                                                                                                                  |
| 13 | "neck injur* ".ab,kw,ti.                                                                                                            |
| 14 | "neck pain* ".ab,kw,ti.                                                                                                             |
| 15 | "neck ache* ".ab,kw,ti.                                                                                                             |
| 16 | "neckache* ".ab,kw,ti.                                                                                                              |
| 17 | (headache* adj3 (cervicogenic or tension)).ab,kw,ti.                                                                                |
| 18 | "brachial plexus neuropath* ".ab,kw,ti.                                                                                             |
| 19 | torticollis.ab,kw,ti.                                                                                                               |
| 20 | or/1-19 [**neck injuries]                                                                                                           |
| 21 | exp Back Injuries/                                                                                                                  |
| 22 | exp Back Pain/                                                                                                                      |
| 23 | Coccyx/in [Injuries]                                                                                                                |
| 24 | Intervertebral Disc Degeneration/                                                                                                   |
| 25 | Intervertebral Disc Displacement/                                                                                                   |
| 26 | Lumbar Vertebrae/in [Injuries]                                                                                                      |
| 27 | Lumbosacral Region/in [Injuries]                                                                                                    |
| 28 | Osteoarthritis, Spine/                                                                                                              |
| 29 | Piriformis Muscle Syndrome/                                                                                                         |
| 30 | Sciatica/                                                                                                                           |
| 31 | Spinal Diseases/                                                                                                                    |
| 32 | Spinal Stenosis/                                                                                                                    |
| 33 | (back adj3 (ache* or disorder* or dysfunction* or injur* or pain*)).ab,kw,ti.                                                       |
| 34 | (backache* adj3 (injur* or pain*)).ab,kw,ti.                                                                                        |
| 35 | (back pain or back-pain).ab,kw,ti.                                                                                                  |
| 36 | (lumbar disc* adj3 (extruded or degenerat* or herniat* or prolapse* or sequestered or slipped)).ab,kw,ti.                           |
| 37 | (lumbar disk* adj3 (extruded or degenerat* or herniat* or prolapse* or sequestered or slipped)).ab,kw,ti.                           |
| 38 | "low* back pain ".ab,kw,ti.                                                                                                         |
| 39 | (lumbar adj3 (pain or facet or nerve root* or osteoarthritis or radicul* or spinal stenosis or spondylo* or zygapophys*)).ab,kw,ti. |
| 40 | "Piriformis syndrome* ".ab,kw,ti.                                                                                                   |
| 41 | (sacral adj2 pain*).ab,kw,ti.                                                                                                       |

|    |                                                                                                                                                                                                                 |
|----|-----------------------------------------------------------------------------------------------------------------------------------------------------------------------------------------------------------------|
| 42 | sciatica.ab,kw,ti.                                                                                                                                                                                              |
| 43 | ((spine or spinal) adj3 (condition* or disable* or disabilit* or disorder* or pain or stenosis)).ab,kw,ti.                                                                                                      |
| 44 | spondylosis.ab,kw,ti.                                                                                                                                                                                           |
| 45 | or/21-44 [**back injuries]                                                                                                                                                                                      |
| 46 | Shoulder Pain/                                                                                                                                                                                                  |
| 47 | exp Cumulative Trauma Disorders/                                                                                                                                                                                |
| 48 | exp Median Neuropathy/                                                                                                                                                                                          |
| 49 | Shoulder Impingement Syndrome/                                                                                                                                                                                  |
| 50 | Shoulder Joint/in [Injuries]                                                                                                                                                                                    |
| 51 | Shoulder/in [Injuries]                                                                                                                                                                                          |
| 52 | exp Arm Injuries/                                                                                                                                                                                               |
| 53 | exp Hand Injuries/                                                                                                                                                                                              |
| 54 | Wrist Injuries/                                                                                                                                                                                                 |
| 55 | Finger Injuries/                                                                                                                                                                                                |
| 56 | exp Tendinopathy/                                                                                                                                                                                               |
| 57 | Radial Neuropathy/                                                                                                                                                                                              |
| 58 | exp Ulnar Neuropathies/                                                                                                                                                                                         |
| 59 | Thoracic Outlet Syndrome/                                                                                                                                                                                       |
| 60 | "carpal tunnel syndrome* ".ab,kw,ti.                                                                                                                                                                            |
| 61 | (medial adj3 (epicondylitis or epicondylitis or epicondylitis or epicondylitis)).ab,kw,ti.                                                                                                                      |
| 62 | (lateral adj3 (epicondylitis or epicondylitis or epicondylitis)).ab,kw,ti.                                                                                                                                      |
| 63 | (shoulder* adj3 (pain* or sprain* or strain* or injur* or impair* or impingement)).ab,kw,ti.                                                                                                                    |
| 64 | (shoulder* adj3 (tendinopathy or tendinitis or tendonitis or capsulitis)).ab,kw,ti.                                                                                                                             |
| 65 | ((glenohumeral or scapula* or acromioclavicular) adj3 (pain* or sprain* or strain* or injur*)).ab,kw,ti.                                                                                                        |
| 66 | (rotator cuff adj3 (sprain* or strain* or tear* or bursitis tendinitis or impingement)).ab,kw,ti.                                                                                                               |
| 67 | ((supraspinatus or infraspinatus or subscapularis or teres minor or teres major or trapezius or deltoid or biceps* or bicipital or coracobrachialis) adj3 (impingement or strain* or tear* or pain*)).ab,kw,ti. |
| 68 | biceps tend?nitis.ab,kw,ti.                                                                                                                                                                                     |
| 69 | painful arc.ab,kw,ti.                                                                                                                                                                                           |
| 70 | frozen shoulder.ab,kw,ti.                                                                                                                                                                                       |
| 71 | ((shoulder and capsul*) adj3 (sprain* or tear*)).ab,kw,ti.                                                                                                                                                      |
| 72 | (arm* adj3 (pain* or sprain* or strain* or injur* or impair*)).ab,kw,ti.                                                                                                                                        |
| 73 | (wrist* adj3 (pain* or sprain* or strain* or injur* or impair*)).ab,kw,ti.                                                                                                                                      |
| 74 | (hand* adj3 (pain* or sprain* or strain* or injur* or impair*)).ab,kw,ti.                                                                                                                                       |
| 75 | (elbow* adj3 (pain* or sprain* or strain* or injur* or impair*)).ab,kw,ti.                                                                                                                                      |
| 76 | "thoracic outlet syndrome* ".ab,kw,ti.                                                                                                                                                                          |
| 77 | tennis elbow.ab,kw,ti.                                                                                                                                                                                          |
| 78 | (rotator cuff adj3 (injur* or disorder*)).ab,kw,ti.                                                                                                                                                             |
| 79 | (median adj neuropath*).ab,kw,ti.                                                                                                                                                                               |
| 80 | (radial adj neuropath*).ab,kw,ti.                                                                                                                                                                               |
| 81 | "upper extremity* injur* ".ab,kw,ti.                                                                                                                                                                            |
| 82 | ((radial or ulnar) adj neuropath*).ab,kw,ti.                                                                                                                                                                    |
| 83 | "cumulative trauma disorder* ".ab,kw,ti.                                                                                                                                                                        |
| 84 | (repetit* adj3 (strain* or sprain* or injur* or disorder*)).ab,kw,ti.                                                                                                                                           |
| 85 | or/46-84 [**upper extremity injuries]                                                                                                                                                                           |
| 86 | exp Hip Injuries/                                                                                                                                                                                               |
| 87 | exp Leg Injuries/                                                                                                                                                                                               |
| 88 | exp Knee Injuries/                                                                                                                                                                                              |
| 89 | exp Foot Injuries/                                                                                                                                                                                              |
| 90 | exp Toes/in [Injuries]                                                                                                                                                                                          |
| 91 | Ankle Injuries/                                                                                                                                                                                                 |

|     |                                                                                                                                                          |
|-----|----------------------------------------------------------------------------------------------------------------------------------------------------------|
| 92  | Lateral Ligament, Ankle/in [Injuries]                                                                                                                    |
| 93  | Fasciitis, Plantar/                                                                                                                                      |
| 94  | (lower adj3 (extremity* or limb* or injur*)).ab,kw,ti.                                                                                                   |
| 95  | (ankle* adj3 (sprain* or strain* or injur*)).ab,kw,ti.                                                                                                   |
| 96  | ((talofibular or calcaneofibular or calcaneotibial or tibio*) adj3 (sprain* or strain* or injur*)).ab,kw,ti.                                             |
| 97  | (buttock* adj3 (injur* or pain*)).ab,kw,ti.                                                                                                              |
| 98  | (foot adj3 (injur* or pain*)).ab,kw,ti.                                                                                                                  |
| 99  | (hip* adj3 (injur* or pain*)).ab,kw,ti.                                                                                                                  |
| 100 | (knee* adj3 (injur* or pain*)).ab,kw,ti.                                                                                                                 |
| 101 | (leg* adj3 (injur* or pain*)).ab,kw,ti.                                                                                                                  |
| 102 | (thigh* adj3 (injur* or pain*)).ab,kw,ti.                                                                                                                |
| 103 | (toe* adj3 (injur* or pain* or turf)).ab,kw,ti.                                                                                                          |
| 104 | "patellofemoral pain syndrome* ".ab,kw,ti.                                                                                                               |
| 105 | tendinosis.ab,kw,ti.                                                                                                                                     |
| 106 | tendinopathy.ab,kw,ti.                                                                                                                                   |
| 107 | plantar fasciitis.ab,kw,ti.                                                                                                                              |
| 108 | or/86-107 [**lower extremity injuries]                                                                                                                   |
| 109 | Musculoskeletal Diseases/                                                                                                                                |
| 110 | ((musculoskeletal or musculo-skeletal or MSK) adj4 (care or condition* or disability* or disorder* or injur* or pain or problem* or trouble*)).ab,kw,ti. |
| 111 | Arthritis/                                                                                                                                               |
| 112 | arthritis.ab,kw,ti.                                                                                                                                      |
| 113 | Bursitis/                                                                                                                                                |
| 114 | bursitis.ab,kw,ti.                                                                                                                                       |
| 115 | exp Osteoarthritis/                                                                                                                                      |
| 116 | osteoarthritis.ab,kw,ti.                                                                                                                                 |
| 117 | Spondylitis, Ankylosing/                                                                                                                                 |
| 118 | (ankylosing adj2 spondylitis).ab,kw,ti.                                                                                                                  |
| 119 | exp Temporomandibular Joint Disorders/                                                                                                                   |
| 120 | temporomandibular.ab,kw,ti.                                                                                                                              |
| 121 | or/109-120 [**MSK general]                                                                                                                               |
| 122 | 20 or 45 or 85 or 108 or 121 [**MSK disorders]                                                                                                           |
| 123 | Acupuncture/                                                                                                                                             |
| 124 | Acupuncture Therapy/                                                                                                                                     |
| 125 | Allied Health Personnel/                                                                                                                                 |
| 126 | Caregivers/                                                                                                                                              |
| 127 | Case Managers/                                                                                                                                           |
| 128 | Chiropractic/                                                                                                                                            |
| 129 | Dentists/                                                                                                                                                |
| 130 | Faculty, Medical/                                                                                                                                        |
| 131 | Faculty, Nursing/                                                                                                                                        |
| 132 | General Practitioners/                                                                                                                                   |
| 133 | Health Educators/                                                                                                                                        |
| 134 | Hospitalists/                                                                                                                                            |
| 135 | Manipulation, Chiropractic/                                                                                                                              |
| 136 | exp Medical Staff/                                                                                                                                       |
| 137 | Medicine, Chinese Traditional/                                                                                                                           |
| 138 | Neurologists/                                                                                                                                            |
| 139 | Neurosurgeons/                                                                                                                                           |
| 140 | exp Nurses/                                                                                                                                              |
| 141 | Nurses' Aides/                                                                                                                                           |

|     |                                                                                                                                                                                                                                                       |
|-----|-------------------------------------------------------------------------------------------------------------------------------------------------------------------------------------------------------------------------------------------------------|
| 142 | exp Nursing/                                                                                                                                                                                                                                          |
| 143 | Occupational Health Physicians/                                                                                                                                                                                                                       |
| 144 | Occupational Therapists/                                                                                                                                                                                                                              |
| 145 | Occupational Therapy/                                                                                                                                                                                                                                 |
| 146 | Orthopedic Surgeons/                                                                                                                                                                                                                                  |
| 147 | exp ORTHOPEDICS/ma [Manpower]                                                                                                                                                                                                                         |
| 148 | Osteopathic Physicians/                                                                                                                                                                                                                               |
| 149 | Physiatrists/                                                                                                                                                                                                                                         |
| 150 | Physical Therapists/                                                                                                                                                                                                                                  |
| 151 | Physical Therapist Assistants/                                                                                                                                                                                                                        |
| 152 | Physical Therapy Modalities/                                                                                                                                                                                                                          |
| 153 | Physical Therapy Specialty/                                                                                                                                                                                                                           |
| 154 | Physicians/                                                                                                                                                                                                                                           |
| 155 | exp Physician Assistants/                                                                                                                                                                                                                             |
| 156 | Physician-Patient Relations/                                                                                                                                                                                                                          |
| 157 | Physicians, Family/                                                                                                                                                                                                                                   |
| 158 | Physicians, Primary Care/                                                                                                                                                                                                                             |
| 159 | Physicians, Women/                                                                                                                                                                                                                                    |
| 160 | Practice Patterns, Physicians/                                                                                                                                                                                                                        |
| 161 | Primary Health Care/                                                                                                                                                                                                                                  |
| 162 | Podiatry/                                                                                                                                                                                                                                             |
| 163 | Professional-Patient Relations/                                                                                                                                                                                                                       |
| 164 | exp Radiologists/                                                                                                                                                                                                                                     |
| 165 | Rheumatologists/                                                                                                                                                                                                                                      |
| 166 | "acupuncturist*".ab,kw,ti.                                                                                                                                                                                                                            |
| 167 | (chiropractic adj2 (physician* or doctor* or practitioner*)).ab,kw,ti.                                                                                                                                                                                |
| 168 | "chiropractor*".ab,kw,ti.                                                                                                                                                                                                                             |
| 169 | dentist.mp. or dentists.ab,kw,ti. [mp=title, abstract, original title, name of substance word, subject heading word, keyword heading word, protocol supplementary concept word, rare disease supplementary concept word, unique identifier, synonyms] |
| 170 | (faculty adj3 (medical or nursing)).ab,kw,ti.                                                                                                                                                                                                         |
| 171 | "general adj2 practitioner*".ab,kw,ti.                                                                                                                                                                                                                |
| 172 | "hospitalist*".ab,kw,ti.                                                                                                                                                                                                                              |
| 173 | "manual adj2 therapist*".ab,kw,ti.                                                                                                                                                                                                                    |
| 174 | naprapath*.ab,kw,ti.                                                                                                                                                                                                                                  |
| 175 | "neurologist*".ab,kw,ti.                                                                                                                                                                                                                              |
| 176 | "nurse*".ab,kw,ti.                                                                                                                                                                                                                                    |
| 177 | (occupational adj2 (physician* or therapist*)).ab,kw,ti.                                                                                                                                                                                              |
| 178 | ((orthopedic or orthopaedic) adj2 surgeon*).ab,kw,ti.                                                                                                                                                                                                 |
| 179 | "osteopath*".ab,kw,ti.                                                                                                                                                                                                                                |
| 180 | "physiatrist*".ab,kw,ti.                                                                                                                                                                                                                              |
| 181 | (physical adj therapist*).ab,kw,ti.                                                                                                                                                                                                                   |
| 182 | "physiotherapist*".ab,kw,ti.                                                                                                                                                                                                                          |
| 183 | "physician*".ab,kw,ti.                                                                                                                                                                                                                                |
| 184 | (primary adj care).ab,kw,ti.                                                                                                                                                                                                                          |
| 185 | "podiatrist*".ab,kw,ti.                                                                                                                                                                                                                               |
| 186 | (psychomotor or psycho-motor or psychomotricien).ab,kw,ti.                                                                                                                                                                                            |
| 187 | "radiologist*".ab,kw,ti.                                                                                                                                                                                                                              |
| 188 | "rheumatologist*".ab,kw,ti.                                                                                                                                                                                                                           |
| 189 | (spine adj3 specialist*).ab,kw,ti.                                                                                                                                                                                                                    |
| 190 | traditional Chinese medicine.ab,kw,ti.                                                                                                                                                                                                                |

|     |                                                                                                                                                                                                                                         |
|-----|-----------------------------------------------------------------------------------------------------------------------------------------------------------------------------------------------------------------------------------------|
| 191 | or/123-190 [**health practitioners]                                                                                                                                                                                                     |
| 192 | Guidelines as Topic/                                                                                                                                                                                                                    |
| 193 | Practice Guidelines as Topic/                                                                                                                                                                                                           |
| 194 | Guideline Adherence/                                                                                                                                                                                                                    |
| 195 | Health Planning Guidelines/                                                                                                                                                                                                             |
| 196 | Clinical Protocols/                                                                                                                                                                                                                     |
| 197 | Consensus Development Conferences as Topic/                                                                                                                                                                                             |
| 198 | guideline.pt.                                                                                                                                                                                                                           |
| 199 | practice guideline.pt.                                                                                                                                                                                                                  |
| 200 | consensus development conference.pt.                                                                                                                                                                                                    |
| 201 | (guideline* adj3 (clinical or consensus or practice or development of validate* or standard*)).ab,kw,ti.                                                                                                                                |
| 202 | (guideline* adj3 (accept* or adher* or adopt* or attitude* or barrier* or belief* or benchmark* or bench mark* or compliance* or comply* or determinant* or diffusion or disseminat* or distribut* or effective* or enable*)).ab,kw,ti. |
| 203 | (guideline* adj3 (impact* or implement* or introduc* or knowledge or motivat* or transfer* or translat* or uptake or use* or utilisat* or utilizat*)).ab,kw,ti.                                                                         |
| 204 | (guideline* adj3 (impact* or implement* or introduc* or knowledge or motivat* or transfer* or translat* or uptake or use* or utilisat* or utilizat*)).ab,kw,ti.                                                                         |
| 205 | (consensus adj3 (conference* or process* or statement*)).ab,kw,ti.                                                                                                                                                                      |
| 206 | (evidence-based adj3 (approach* or guideline* or recommendation* or consensus or position statement*)).ab,kw,ti.                                                                                                                        |
| 207 | (evidence based adj3 (approach* or guideline* or recommendation* or consensus or position statement*)).ab,kw,ti.                                                                                                                        |
| 208 | (evidence-informed adj3 (approach* or guideline* or recommendation* or consensus or position statement*)).ab,kw,ti.                                                                                                                     |
| 209 | (evidence informed adj3 (approach* or guideline* or recommendation* or consensus or position statement*)).ab,kw,ti.                                                                                                                     |
| 210 | (practice adj2 parameter*).ab,kw,ti.                                                                                                                                                                                                    |
| 211 | or/192-210 [**guidelines]                                                                                                                                                                                                               |
| 212 | 122 and 191 and 211                                                                                                                                                                                                                     |
| 213 | limit 212 to (english or french or spanish)                                                                                                                                                                                             |
